# Supplementary material for: Fatty Acid and Related Potassium Kv2 Channel Blockers: Toxicity and Physiological Actions on Mosquitoes
Source: MDPI journal article supplement (doi:10.3390/insects9040155), 2018-11-01
Supplement: s1 [file s1]

# **FATTY ACID AND RELATED POTASSIUM Kv2 CHANNEL BLOCKERS: TOXICITY AND PHYSIOLOGICAL ACTIONS ON MOSQUITOES.**

FABIEN DÉMARES <sup>1,\*</sup>, QUENTIN COQUEREL <sup>1</sup>, GARY RICHOUX <sup>1</sup>, KENNETH LINTHICUM <sup>2</sup> AND JEFFREY BLOOMQUIST <sup>1,\*</sup>

<sup>1</sup> Neurotoxicology Laboratory, Entomology and Nematology Department, Emerging Pathogens Institute, University of Florida, Gainesville, FL, USA.

<sup>2</sup> USDA, ARS, Center for Medical, Agricultural and Veterinary Entomology, Gainesville, FL, USA.

\* Correspondence: [fabien.demares@ufl.edu](mailto:fabien.demares@ufl.edu); [jbquist@ufl.edu](mailto:jbquist@ufl.edu); Tel.: +1 (352) 294-5166.

---

## **Supplementary Materials**

**Figure S1. Co-application of piperonyl butoxide (PBO) with fatty acid compounds.**

**Table S1. Comparison of 5-HDC alone and 5-HDC/PBO co-application on *Anopheles gambiae* G3, with probit slopes and KD<sub>50</sub>/LD<sub>50</sub> values.**

**Figure S1.**

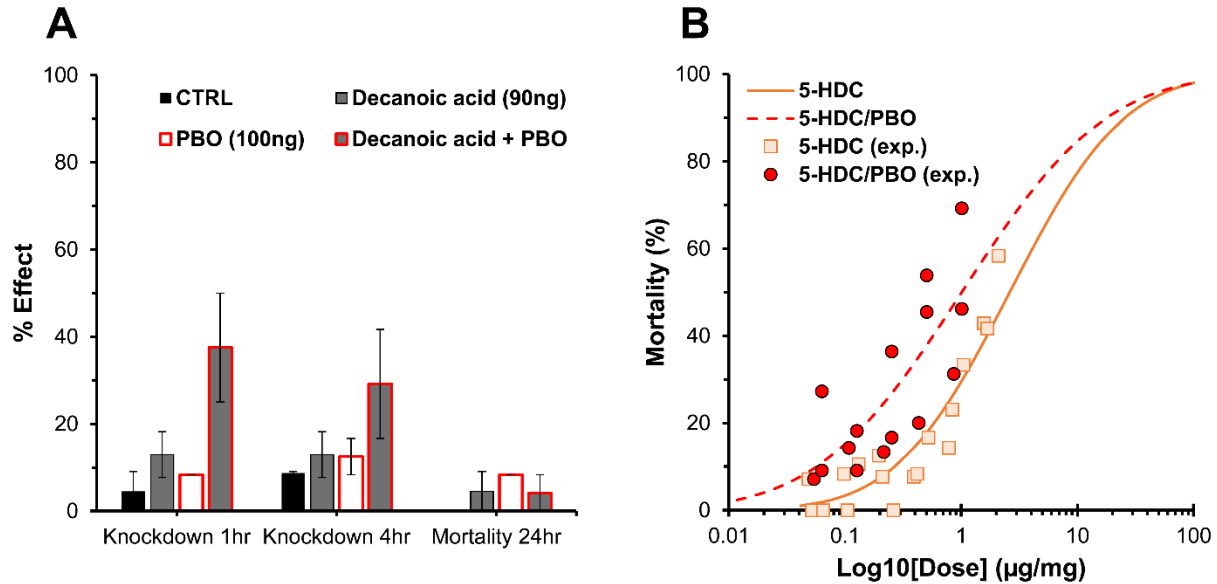

**Figure S1. Co-application of piperonyl butoxide (PBO) with fatty acid compounds.** (A) Decanoic acid was tested for one dose ( $LD_{15} = 90$  ng) and co-applied with 100 ng of PBO (which correspond to  $LD_{15}$  as well). Despite a visible knockdown effect (not statistically significant) of co-applied decanoic acid and PBO after 1 and 4 hours, there was no significant synergistic effect on mortality at 24 hours. (B) For 5-HDC, the probit analyses (curves) were calculated from a range of tested doses (colored symbols, experimental values). The slopes and  $LD_{50}$  values have been determined, and are reported in Table S1. For 5-HDC alone,  $LD_{50} = 2.6$  µg; for co-applied 5-HDC/PBO,  $LD_{50} = 1.0$  µg. But the 95% confidence intervals overlap extensively, which means no significant difference between topical application with or without PBO.

**Table S1. Comparison of 5-HDC alone and 5-HDC/PBO co-application on *Anopheles gambiae* G3, with probit slopes and KD<sub>50</sub>/LD<sub>50</sub> values. KD and LD values are in µg/mg of body weight.**

|                        | 1 hour         |                       | 4 hours        |                       | 24 hours       |                       |
|------------------------|----------------|-----------------------|----------------|-----------------------|----------------|-----------------------|
|                        | Slope          | KD <sub>50</sub>      | Slope          | KD <sub>50</sub>      | Slope          | LD <sub>50</sub>      |
|                        | (SE)           | [CI95%]               | (SE)           | [CI95%]               | (SE)           | [CI95%]               |
| <b>5-HDC</b>           | 1.44<br>(0.07) | 0.71<br>[0.58 - 0.91] | 1.28<br>(0.07) | 0.91<br>[0.66 - 1.41] | 1.29<br>(0.09) | 2.62<br>[1.6 - 6.26]  |
| <b>5-HDC<br/>+ PBO</b> | 1.03<br>(0.08) | 0.23<br>[0.15 - 0.37] | 0.71<br>(0.08) | 0.27<br>[0.15 - 0.55] | 1.03<br>(0.09) | 1.01<br>[0.56 - 4.35] |
